# Supplementary material
Source: HighWire-hosted journal article supplement (https://www.cmaj.ca/highwire/filestream/59783/field_highwire_adjunct_files/1/151483-res-2-at.pdf)
Supplement: 151483-res-2-at.pdf [file 151483-res-2-at.pdf]

## Appendix 2 (as supplied by the authors): Conditional prediction of future FEV<sub>1</sub> given baseline FEV<sub>1</sub> values from the final model

In our model, observed FEV<sub>1</sub> is modeled as

$$FEV_t = \beta_0 + \beta \cdot X + \beta'_0 \cdot t + \beta' \cdot X \cdot t + \beta'' \cdot t^2 + int * sign(t) + e,$$

Where  $\beta_0$  (intercept) and  $\beta'_0$  (slope) are random, represented by a bivariate normal distribution whose parameters are directly estimated from the regression model,

$$(\beta_0, \beta'_0) \sim BVN(\text{mean} = (\bar{\beta}_0, \bar{\beta}'_0), \text{covariance} = \begin{bmatrix} \text{Var}(\beta_0) & \text{Cov}(\beta_0, \beta'_0) \\ \text{Cov}(\beta_0, \beta'_0) & \text{Var}(\beta'_0) \end{bmatrix}).$$

Other coefficients are fixed. The *int* represents receiving intervention and is modeled only for follow-up FEV<sub>1</sub>s (where  $sign(t) = 1$ ),  $X$  is the set of covariates (i.e., baseline age, sex, weight, height, height squared, smoking status, O'connor slope, and interaction of baseline age and height squared),  $t$  represents time (year), and  $e$  is a normally distributed error term for the prediction.

This model connects any two FEV<sub>1</sub> values among patients as having bivariate normal distributions. A follow-up FEV<sub>1</sub> and baseline FEV<sub>1</sub> can therefore be jointly parameterized as:

$$\mu = \begin{bmatrix} \mu_1 \\ \mu_2 \end{bmatrix} = \begin{bmatrix} \bar{\beta}_0 + \beta \cdot X + \beta' \cdot X \cdot t + \bar{\beta}'_0 \cdot t + \beta'' \cdot t^2 + int \\ \bar{\beta}_0 + \beta \cdot X \end{bmatrix},$$

$$cov = \begin{bmatrix} \Sigma_{11} & \Sigma_{12} \\ \Sigma_{21} & \Sigma_{22} \end{bmatrix} = \begin{bmatrix} \text{Var}(\beta_0) + 2 \cdot t \cdot \text{cov}(\beta_0, \beta'_0) + t^2 \cdot \text{var}(\beta'_0) + \text{var}(e) & \text{Var}(\beta_0) + t \cdot \text{cov}(\beta_0, \beta'_0) \\ \text{Var}(\beta_0) + t \cdot \text{cov}(\beta_0, \beta'_0) & \text{Var}(\beta_0) + \text{var}(e) \end{bmatrix}.$$

Conditional on observed baseline FEV<sub>1</sub> having a value of  $Y_0$ , FEV<sub>t</sub> gets an updated normal distribution with the following parameters:

$$\mu'(mean) = \mu_1 + \Sigma_{12} \cdot \Sigma_{22}^{-1} \cdot (Y_0 - \mu_2),$$

$$v'(variance) = \Sigma_{11} - \Sigma_{12} \cdot \Sigma_{22}^{-1} \cdot \Sigma_{21} \quad (2).$$

For the incorporation of the previous history of FEV<sub>1</sub>, the same line of reasoning is applied, noticing that any three FEV<sub>1</sub> values for the same individual have tri-variate normal distribution and the conditional mean and variance of follow-up FEV<sub>1</sub> given the baseline and previous FEV<sub>1</sub> can be obtained using the same matrix equations where  $\mu_2$ ,  $\Sigma_{12}$ ,  $\Sigma_{21}$ , and  $\Sigma_{22}$  are updated as follows:

$$\mu_2 = \begin{bmatrix} \bar{\beta}_0 + \beta \cdot X \\ \bar{\beta}_0 + \beta \cdot X + \beta' \cdot X \cdot (-1) + \bar{\beta}'_0 \cdot (-1) + \beta'' \cdot (-1)^2 \end{bmatrix},$$

$$\Sigma_{12} = [\text{Var}(\beta_0) + t \cdot \text{cov}(\beta_0, \beta'_0) \quad \text{Var}(\beta_0) - \text{cov}(\beta_0, \beta'_0) + t \cdot \text{cov}(\beta_0, \beta'_0) - t \cdot \text{var}(\beta'_0)],$$

$$\Sigma_{21} = \begin{bmatrix} \text{Var}(\beta_0) + t \cdot \text{cov}(\beta_0, \beta'_0) \\ \text{Var}(\beta_0) - \text{cov}(\beta_0, \beta'_0) + t \cdot \text{cov}(\beta_0, \beta'_0) - t \cdot \text{var}(\beta'_0) \end{bmatrix},$$

$$\Sigma_{22} = \begin{bmatrix} \text{var}(\beta_0) + \text{var}(e) & \text{var}(\beta_0) - \text{cov}(\beta_0, \beta'_0) \\ \text{var}(\beta_0) - \text{cov}(\beta_0, \beta'_0) & \text{Var}(\beta_0) - 2 \cdot \text{cov}(\beta_0, \beta'_0) + \text{var}(\beta'_0) + \text{var}(e) \end{bmatrix}.$$
